# Supplementary material for: The Coordinated Activities of nAChR and Wnt Signaling Regulate Intestinal Stem Cell Function in Mice
Source: PubMed Central journal article supplement (PMC5877599; doi:10.3390/ijms19030738), 2018-03-05
Supplement: ijms-19-00738-s001.pdf [file ijms-19-00738-s001.pdf]

Supplementary

# The Coordinated Activities of nAChR and Wnt Signaling Regulate Intestinal Stem Cell Function in Mice

Toshio Takahashi \*, Akira Shiraishi and Jun Murata

Suntory Foundation for Life Sciences, Bioorganic Research Institute, Kyoto 619-0284, Japan; shiraishi@sunbor.or.jp (A.S.); murata-j@sunbor.or.jp (J.M.)

\* Correspondence: takahashi@sunbor.or.jp; Tel.: +81-50-3182-0707; Fax: +81-774-98-6262

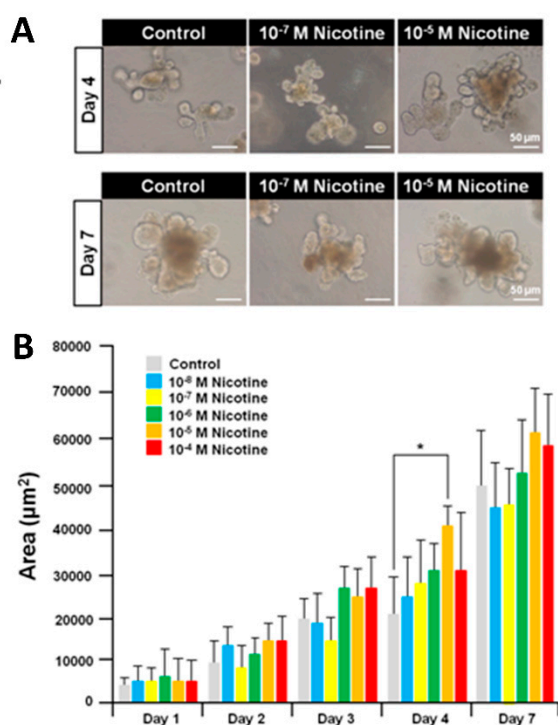

**Figure S1.** Effect of nicotine on organoid growth. (A) Micrographs of organoids after treatment with 10<sup>-7</sup> M and 10<sup>-5</sup> M nicotine for 4 days and 7 days of culture. (B) Effect of nicotine on the size of cultured organoids. Each sample represents an average of three independent experiments. Error bars represent the standard deviation of the mean. An asterisk indicates a statistically significant difference from untreated control organoids (Mann-Whitney test, \*p<0.05).

**Table S1.** RNA-sequencing analysis of gene expression after 3 days and 7 days of nicotine treatment.

| Genbank ID   | Gene Name | FPKM <sup>1</sup> |                    |                    |        |                    |                    | Fold change <sup>2</sup> |                    |                    |                    | Pathway                        |
|--------------|-----------|-------------------|--------------------|--------------------|--------|--------------------|--------------------|--------------------------|--------------------|--------------------|--------------------|--------------------------------|
|              |           | 3 days            |                    |                    | 7 days |                    |                    | 3 days                   |                    | 7 days             |                    |                                |
|              |           | CTL               | 10 <sup>-7</sup> M | 10 <sup>-5</sup> M | CTL    | 10 <sup>-7</sup> M | 10 <sup>-5</sup> M | 10 <sup>-7</sup> M       | 10 <sup>-5</sup> M | 10 <sup>-7</sup> M | 10 <sup>-5</sup> M |                                |
| NM_001164147 | Tcf3      | 21.36             | 27.80              | 26.99              | 3.04   | 27.13              | 90.34              | 1.30                     | 1.26               | 8.91               | 29.67              | Stem                           |
| NM_011386    | Skil      | 2.10              | 4.46               | 6.59               | 0.64   | 4.54               | 7.79               | 2.13                     | 3.14               | 7.06               | 12.13              | Stem                           |
| NM_021878    | Jarid2    | 2.95              | 0.00               | 5.07               | 2.56   | 16.75              | 13.53              | 0.00                     | 1.71               | 6.53               | 5.28               | Stem                           |
| NM_011548    | Tcf3      | 42.23             | 40.31              | 45.10              | 33.77  | 63.42              | 139.21             | 0.95                     | 1.07               | 1.88               | 4.12               | Stem                           |
| NM_001039537 | Lif       | 5.65              | 1.51               | 1.81               | 1.22   | 8.72               | 6.17               | 0.27                     | 0.32               | 7.17               | 5.08               | Stem                           |
| NM_001164042 | Smad5     | 3.88              | 0.00               | 5.80               | 0.01   | 2.18               | 1.77               | 0.00                     | 1.50               | 405.58             | 329.32             | Stem                           |
| NM_001081149 | Kat6a     | 60.88             | 63.06              | 68.05              | 31.95  | 72.90              | 74.69              | 1.04                     | 1.12               | 2.28               | 2.34               | Stem                           |
| NM_011263    | Rest      | 23.40             | 25.66              | 24.51              | 14.76  | 36.25              | 35.08              | 1.10                     | 1.05               | 2.46               | 2.38               | Stem                           |
| NM_007958    | Smarcacl1 | 35.76             | 45.53              | 38.51              | 21.00  | 38.01              | 48.28              | 1.27                     | 1.08               | 1.81               | 2.30               | Stem                           |
| NM_001164153 | Tcf3      | 9.66              | 4.01               | 7.26               | 5.75   | 11.43              | 14.01              | 0.42                     | 0.75               | 1.99               | 2.44               | Stem                           |
| NM_001205043 | Jarid2    | 16.25             | 15.39              | 22.60              | 14.27  | 22.90              | 32.82              | 0.95                     | 1.39               | 1.60               | 2.30               | Stem                           |
| NM_175238    | Rif1      | 52.62             | 60.79              | 64.49              | 39.51  | 76.49              | 73.71              | 1.16                     | 1.23               | 1.94               | 1.87               | Stem                           |
| NM_011535    | Tbx3      | 9.19              | 23.08              | 9.13               | 14.55  | 25.23              | 26.73              | 2.51                     | 0.99               | 1.73               | 1.84               | Stem                           |
| NM_010560    | Il6st     | 24.12             | 27.08              | 27.25              | 15.26  | 28.89              | 27.68              | 1.12                     | 1.13               | 1.89               | 1.81               | Stem                           |
| NM_007496    | Zfxh3     | 8.76              | 8.75               | 8.78               | 6.47   | 11.87              | 11.59              | 1.00                     | 1.00               | 1.83               | 1.79               | Stem                           |
| NM_001163641 | Setdb1    | 2.64              | 2.60               | 2.00               | 4.27   | 10.00              | 7.86               | 0.98                     | 0.76               | 2.34               | 1.84               | Stem                           |
| NM_172716    | Pcgf3     | 88.05             | 87.14              | 97.56              | 57.17  | 89.48              | 96.34              | 0.99                     | 1.11               | 1.57               | 1.68               | Stem                           |
| NM_007395    | Aevr1b    | 141.2             | 139.4              | 146.1              | 112.2  | 183.0              | 183.6              | 0.99                     | 1.03               | 1.63               | 1.64               | Stem                           |
| NM_001077495 | Pik3r1    | 113.9             | 122.5              | 124.7              | 82.1   | 156.6              | 149.2              | 1.08                     | 1.09               | 1.91               | 1.82               | Stem, THS, Rap1, actin         |
| NM_019827    | Gsk3b     | 74.22             | 80.95              | 77.99              | 55.82  | 91.30              | 95.20              | 1.09                     | 1.05               | 1.64               | 1.71               | Stem, THS, Hippo, Wnt          |
| NM_007614    | Ctnnb1    | 952.8             | 864.2              | 747.4              | 511.6  | 824.8              | 963.8              | 0.91                     | 0.78               | 1.61               | 1.88               | Stem, THSHippo, Wnt, Rap1      |
| NM_007561    | Bmpr2     | 23.86             | 24.02              | 25.36              | 18.57  | 29.62              | 31.49              | 1.01                     | 1.06               | 1.60               | 1.70               | Stem, Hippo                    |
| NM_008055    | Fzd4      | 23.10             | 22.65              | 21.69              | 14.33  | 26.10              | 28.56              | 0.98                     | 0.94               | 1.82               | 1.99               | Stem, Hippo, Wnt               |
| NM_001162494 | Fzd6      | 14.48             | 14.75              | 15.65              | 10.40  | 20.86              | 19.53              | 1.02                     | 1.08               | 2.01               | 1.88               | Stem, Hippo, Wnt               |
| NM_022721    | Fzd5      | 99.59             | 104.59             | 88.47              | 36.53  | 67.40              | 65.63              | 1.05                     | 0.89               | 1.84               | 1.80               | Stem, Hippo, Wnt               |
| NM_007889    | Dvl3      | 74.16             | 79.85              | 75.89              | 45.13  | 78.74              | 78.07              | 1.08                     | 1.02               | 1.74               | 1.73               | Stem, Hippo, Wnt               |
| NM_001256224 | Wnt5a     | 0.15              | 0.20               | 0.21               | 0.00   | 1.16               | 0.98               | 1.30                     | 1.37               | 4624.5             | 3885.7             | Stem, Hippo, Wnt               |
| NM_011719    | Wnt9b     | 2.43              | 3.16               | 3.04               | 1.82   | 3.34               | 2.56               | 1.30                     | 1.25               | 1.84               | 1.41               | Stem, Hippo, Wnt               |
| NM_007462    | Apc       | 65.36             | 69.78              | 66.21              | 35.33  | 68.58              | 70.15              | 1.07                     | 1.01               | 1.94               | 1.99               | Stem, Hippo, Wnt               |
| NM_010207    | Fgfr2     | 15.50             | 17.67              | 16.77              | 15.65  | 25.61              | 26.65              | 1.14                     | 1.08               | 1.64               | 1.70               | Stem, MAPK, Endoc, Rap1, Actin |
| NM_001080118 | Med1      | 51.29             | 56.80              | 53.88              | 4.96   | 58.02              | 56.25              | 1.11                     | 1.05               | 11.70              | 11.34              | THS                            |
| NM_012005    | Med14     | 13.53             | 12.72              | 11.40              | 3.89   | 16.82              | 17.62              | 0.94                     | 0.84               | 4.33               | 4.53               | THS                            |
| NM_001205314 | Stat1     | 10.96             | 3.65               | 8.51               | 3.11   | 4.83               | 11.42              | 0.33                     | 0.78               | 1.55               | 3.67               | THS                            |
| NM_001110350 | Sin3a     | 8.08              | 8.96               | 12.06              | 6.11   | 16.69              | 19.70              | 1.11                     | 1.49               | 2.73               | 3.22               | THS                            |
| NM_020005    | Kat2b     | 20.88             | 14.04              | 13.74              | 6.25   | 15.35              | 15.95              | 0.67                     | 0.66               | 2.45               | 2.55               | THS                            |
| NM_008678    | Ncoa2     | 39.88             | 40.39              | 41.79              | 23.07  | 43.82              | 52.20              | 1.01                     | 1.05               | 1.90               | 2.26               | THS                            |
| NM_001252313 | Ncor1     | 124.8             | 132.4              | 132.4              | 77.40  | 143.1              | 152.4              | 1.06                     | 1.06               | 1.85               | 1.97               | THS                            |
| NM_001080931 | Med13     | 58.06             | 59.16              | 60.77              | 30.90  | 57.87              | 60.93              | 1.02                     | 1.05               | 1.87               | 1.97               | THS                            |
| NM_011062    | Pdpk1     | 76.03             | 87.35              | 85.04              | 41.64  | 77.22              | 80.73              | 1.15                     | 1.12               | 1.85               | 1.94               | THS                            |
| NM_001286718 | Tsc2      | 10.21             | 28.26              | 24.48              | 8.81   | 17.51              | 16.87              | 2.77                     | 2.40               | 1.99               | 1.92               | THS                            |
| NM_007503    | Fxyd2     | 0.00              | 0.26               | 0.00               | 0.00   | 0.52               | 0.78               | 264974                   | 1.00               | 522973             | 781995             | THS                            |
| NM_008714    | Notch1    | 46.72             | 52.65              | 51.60              | 30.85  | 52.23              | 53.52              | 1.13                     | 1.10               | 1.69               | 1.74               | THS                            |
| NM_001286713 | Tsc2      | 15.72             | 11.82              | 19.20              | 8.40   | 14.61              | 15.02              | 0.75                     | 1.22               | 1.74               | 1.79               | THS                            |
| NM_172424    | Med13l    | 36.02             | 32.56              | 35.60              | 25.49  | 47.51              | 43.44              | 0.90                     | 0.99               | 1.86               | 1.70               | THS                            |
| NM_021521    | Med12     | 37.89             | 39.13              | 38.00              | 27.09  | 49.96              | 46.01              | 1.03                     | 1.00               | 1.84               | 1.70               | THS                            |
| NM_011308    | Ncor1     | 51.04             | 56.99              | 52.30              | 30.92  | 54.40              | 52.07              | 1.12                     | 1.02               | 1.76               | 1.68               | THS                            |
| NM_008716    | Notch3    | 0.91              | 1.35               | 1.08               | 3.14   | 5.47               | 5.81               | 1.49                     | 1.20               | 1.74               | 1.85               | THS                            |
| NM_177229    | Ncor1     | 12.77             | 16.96              | 17.19              | 20.51  | 31.96              | 34.34              | 1.33                     | 1.35               | 1.56               | 1.67               | THS                            |
| NM_011378    | Sin3a     | 11.46             | 12.63              | 4.57               | 4.34   | 7.40               | 7.66               | 1.10                     | 0.40               | 1.70               | 1.76               | THS                            |
| NM_001025432 | Crebbp    | 37.65             | 37.26              | 36.89              | 17.36  | 38.44              | 37.54              | 0.99                     | 0.98               | 2.21               | 2.16               | THS, Wnt                       |
| NM_177821    | Ep300     | 76.51             | 76.01              | 75.87              | 41.31  | 80.85              | 79.91              | 0.99                     | 0.99               | 1.96               | 1.93               | THS, Wnt                       |
| NM_001145830 | Plcb1     | 0.00              | 0.07               | 2.02               | 0.00   | 1.97               | 3.52               | 359.67                   | 10805.6            | 4295.0             | 7695.3             | THS, Wnt, Rap1                 |
| NM_001005784 | Patj      | 17.59             | 6.81               | 10.91              | 2.81   | 10.49              | 10.89              | 0.39                     | 0.62               | 3.74               | 3.88               | Hippo                          |
| NM_026735    | Mob1b     | 98.07             | 112.8              | 107.5              | 43.32  | 98.40              | 102.9              | 1.15                     | 1.10               | 2.27               | 2.37               | Hippo                          |
| NM_007862    | Dlg1      | 36.66             | 43.47              | 43.25              | 37.47  | 65.31              | 73.37              | 1.19                     | 1.18               | 1.74               | 1.96               | Hippo                          |
| NM_001252253 | Nf2       | 0.00              | 1.77               | 0.86               | 0.73   | 2.23               | 2.27               | 1770261                  | 856702             | 3.07               | 3.11               | Hippo                          |
| NM_001109752 | Dlg4      | 0.04              | 0.68               | 0.30               | 1.07   | 2.44               | 2.80               | 16.37                    | 7.20               | 2.28               | 2.62               | Hippo                          |
| NM_145571    | Mob1a     | 261.5             | 272.1              | 273.8              | 179.4  | 295.0              | 330.2              | 1.04                     | 1.05               | 1.64               | 1.84               | Hippo                          |
| NM_001166585 | Tead1     | 18.50             | 30.61              | 24.13              | 19.68  | 38.42              | 32.32              | 1.65                     | 1.30               | 1.95               | 1.64               | Hippo                          |
| NM_010690    | Lats1     | 81.69             | 90.21              | 88.21              | 57.88  | 94.78              | 93.62              | 1.10                     | 1.08               | 1.64               | 1.62               | Hippo                          |
| NM_134015    | Fbxw11    | 0.00              | 2.60               | 3.39               | 0.00   | 5.80               | 4.56               | 1819.1                   | 2373.5             | 11826.2            | 9287.3             | Hippo, Wnt                     |
| NM_001271347 | Fbxw11    | 1.62              | 1.69               | 0.01               | 1.23   | 3.25               | 5.18               | 1.04                     | 0.01               | 2.65               | 4.22               | Hippo, Wnt                     |
| NM_001271348 | Fbxw11    | 53.57             | 56.79              | 55.64              | 32.31  | 67.58              | 64.46              | 1.06                     | 1.04               | 2.09               | 2.00               | Hippo, Wnt                     |
| NM_001142920 | Tcf7l2    | 19.60             | 24.13              | 24.20              | 13.06  | 24.64              | 23.58              | 1.23                     | 1.23               | 1.89               | 1.81               | Hippo, Wnt                     |
| NM_009371    | Tgfbr2    | 68.42             | 45.51              | 62.30              | 30.71  | 101.4              | 96.22              | 0.67                     | 0.91               | 3.30               | 3.13               | Hippo, MAPK, Endoc             |
| NM_001122850 | Pard3     | 36.14             | 34.58              | 37.05              | 29.69  | 48.20              | 49.14              | 0.96                     | 1.03               | 1.62               | 1.66               | Hippo, Endocytosis, Rap1       |
| NM_020601    | Tbl1x     | 129.4             | 140.4              | 140.8              | 104.8  | 216.3              | 226.6              | 1.08                     | 1.09               | 2.06               | 2.16               | Wnt                            |

|              |           |       |       |       |        |        |        |        |        |         |          |                   |
|--------------|-----------|-------|-------|-------|--------|--------|--------|--------|--------|---------|----------|-------------------|
| NM_001004367 | Cxhc4     | 0.52  | 0.81  | 0.60  | 0.46   | 1.22   | 1.58   | 1.56   | 1.16   | 2.63    | 3.41     | Wnt               |
| NM_008514    | Lrp6      | 70.38 | 74.94 | 78.31 | 47.65  | 80.35  | 82.44  | 1.06   | 1.11   | 1.69    | 1.73     | Wnt               |
| NM_013502    | Ctbp1     | 40.62 | 41.05 | 44.38 | 25.53  | 42.38  | 42.60  | 1.01   | 1.09   | 1.66    | 1.67     | Wnt               |
| NM_172688    | Map3k7    | 2.63  | 1.81  | 1.62  | 0.00   | 2.17   | 3.04   | 0.69   | 0.62   | 17479.4 | 24452.2  | Wnt, MAPK         |
| NM_001164112 | Nfatc1    | 4.49  | 5.37  | 3.91  | 2.95   | 4.71   | 5.86   | 1.20   | 0.87   | 1.60    | 1.99     | Wnt, MAPK         |
| NM_013931    | Mapk8ip3  | 1.66  | 13.56 | 9.65  | 0.00   | 6.35   | 11.29  | 8.18   | 5.82   | 5197650 | 9245016  | MAPK              |
| NM_001163453 | Mapk8ip3  | 32.12 | 23.92 | 30.11 | 4.59   | 43.76  | 37.46  | 0.74   | 0.94   | 9.54    | 8.16     | MAPK              |
| NM_008696    | Map4k4    | 6.43  | 4.14  | 7.18  | 0.00   | 1.97   | 5.78   | 0.64   | 1.12   | 446.54  | 1310.89  | MAPK              |
| NM_001285488 | Mknk1     | 0.00  | 0.00  | 0.00  | 0.00   | 2.36   | 3.89   | 0.90   | 1.34   | 7221.68 | 11869.48 | MAPK              |
| NM_001163643 | Map3k12   | 1.03  | 0.00  | 1.04  | 0.00   | 1.09   | 2.89   | 0.00   | 1.01   | 3543.67 | 9417.03  | MAPK              |
| NM_009784    | Cacna2d1  | 1.36  | 2.25  | 1.86  | 0.01   | 2.21   | 2.61   | 1.65   | 1.36   | 350.92  | 414.06   | MAPK              |
| NM_007923    | Elk4      | 36.98 | 38.84 | 41.78 | 12.93  | 43.41  | 40.98  | 1.05   | 1.13   | 3.36    | 3.17     | MAPK              |
| NM_001038609 | Mapt      | 2.22  | 0.00  | 2.23  | 1.00   | 3.33   | 3.69   | 0.00   | 1.00   | 3.33    | 3.68     | MAPK              |
| NM_148945    | Rps6ka3   | 101.4 | 101.2 | 108.2 | 56.6   | 132.9  | 128.8  | 1.00   | 1.07   | 2.35    | 2.27     | MAPK              |
| NM_172821    | Map3k13   | 20.32 | 21.87 | 23.39 | 8.59   | 19.08  | 19.42  | 1.08   | 1.15   | 2.22    | 2.26     | MAPK              |
| NM_001161423 | Ikbkg     | 0.72  | 1.08  | 0.00  | 0.00   | 0.23   | 1.07   | 1.50   | 0.00   | 690.35  | 3220.9   | MAPK              |
| NM_001252060 | Cacna1a   | 1.54  | 3.32  | 7.09  | 1.68   | 7.86   | 4.47   | 2.16   | 4.61   | 4.67    | 2.65     | MAPK              |
| NM_001284371 | Atf2      | 2.68  | 3.62  | 2.82  | 1.53   | 2.85   | 3.76   | 1.35   | 1.05   | 1.86    | 2.45     | MAPK              |
| NM_144825    | Taok1     | 41.52 | 45.14 | 46.44 | 26.07  | 48.80  | 48.77  | 1.09   | 1.12   | 1.87    | 1.87     | MAPK              |
| NM_001252202 | Map4k4    | 20.13 | 23.46 | 29.01 | 24.23  | 44.84  | 45.25  | 1.16   | 1.44   | 1.85    | 1.87     | MAPK              |
| NM_007746    | Map3k8    | 1.80  | 1.55  | 2.31  | 1.39   | 2.96   | 3.34   | 0.86   | 1.28   | 2.14    | 2.41     | MAPK              |
| NM_013560    | Hspb1     | 1.04  | 0.28  | 0.28  | 0.00   | 0.27   | 0.77   | 0.27   | 0.27   | 267089  | 767023   | MAPK              |
| NM_134080    | Flnb      | 158.8 | 158.3 | 160.4 | 127.8  | 202.0  | 222.0  | 1.00   | 1.01   | 1.58    | 1.74     | MAPK              |
| NM_010897    | Nfl       | 23.12 | 24.34 | 23.48 | 17.16  | 29.67  | 30.39  | 1.05   | 1.02   | 1.73    | 1.77     | MAPK              |
| NM_011946    | Map3k2    | 39.78 | 40.79 | 43.89 | 21.75  | 37.74  | 36.97  | 1.03   | 1.10   | 1.74    | 1.70     | MAPK              |
| NM_001174049 | Cacna2d2  | 0.20  | 0.19  | 0.11  | 0.72   | 1.46   | 1.83   | 0.94   | 0.53   | 2.02    | 2.53     | MAPK              |
| NM_001025093 | Atf2      | 23.47 | 24.38 | 22.69 | 12.38  | 32.70  | 20.71  | 1.04   | 0.97   | 2.64    | 1.67     | MAPK              |
| NM_008301    | Hspa2     | 2.23  | 2.17  | 2.70  | 0.00   | 4.03   | 3.70   | 0.97   | 1.21   | 1853.2  | 1702.1   | MAPK, Endoc       |
| NM_007764    | Crkl      | 64.19 | 75.31 | 70.71 | 44.28  | 73.64  | 73.83  | 1.17   | 1.10   | 1.66    | 1.67     | MAPK, Rap1, Actin |
| NM_139294    | Braf      | 17.69 | 20.93 | 20.70 | 16.86  | 27.69  | 28.10  | 1.18   | 1.17   | 1.64    | 1.67     | MAPK, Rap1, Actin |
| NM_001177558 | Gng12     | 31.82 | 18.23 | 30.57 | 8.08   | 23.46  | 24.62  | 0.57   | 0.96   | 2.90    | 3.05     | MAPK, Actin       |
| NM_001162868 | Rab11fip3 | 9.01  | 0.03  | 15.19 | 0.01   | 4.50   | 12.85  | 0.00   | 1.69   | 440.48  | 1258.2   | Endocytosis       |
| NM_007619    | Cbl       | 42.11 | 44.01 | 45.33 | 9.18   | 44.98  | 50.96  | 1.05   | 1.08   | 4.90    | 5.55     | Endocytosis       |
| NM_001134383 | Iqsec1    | 7.51  | 5.68  | 6.88  | 1.92   | 9.22   | 11.27  | 0.76   | 0.92   | 4.81    | 5.87     | Endocytosis       |
| NM_001276462 | Asap1     | 0.00  | 4.21  | 0.40  | 1.08   | 3.38   | 5.32   | 1756.6 | 166.1  | 3.14    | 4.94     | Endocytosis       |
| NM_001164056 | Pld1      | 12.30 | 10.84 | 6.85  | 8.05   | 13.95  | 19.38  | 0.88   | 0.56   | 1.73    | 2.41     | Endocytosis       |
| NM_029438    | Smurf1    | 4.03  | 9.39  | 6.64  | 6.46   | 11.20  | 15.75  | 2.33   | 1.65   | 1.73    | 2.44     | Endocytosis       |
| NM_001080813 | Rab11fip1 | 35.82 | 40.67 | 36.44 | 18.07  | 31.64  | 37.77  | 1.14   | 1.02   | 1.75    | 2.09     | Endocytosis       |
| NM_001164678 | Pdcd6ip   | 10.32 | 16.65 | 20.95 | 9.91   | 18.52  | 20.88  | 1.61   | 2.03   | 1.87    | 2.11     | Endocytosis       |
| NM_010153    | Erbp3     | 219.6 | 223.5 | 233.1 | 106.7  | 208.8  | 214.5  | 1.02   | 1.06   | 1.96    | 2.01     | Endocytosis       |
| NM_001114664 | Iqsec2    | 4.94  | 7.85  | 7.72  | 4.04   | 7.19   | 8.94   | 1.59   | 1.56   | 1.78    | 2.21     | Endocytosis       |
| NM_001144988 | Spq20     | 17.52 | 12.64 | 14.73 | 4.51   | 12.59  | 9.73   | 0.72   | 0.84   | 2.79    | 2.16     | Endocytosis       |
| NM_001285806 | Grk3      | 3.41  | 0.00  | 1.93  | 4.08   | 10.02  | 8.88   | 0.00   | 0.56   | 2.45    | 2.17     | Endocytosis       |
| NM_001164367 | Rab11fip2 | 3.45  | 3.63  | 3.09  | 2.69   | 6.88   | 5.98   | 1.05   | 0.90   | 2.55    | 2.22     | Endocytosis       |
| NM_027487    | Ccdc53    | 2.23  | 4.93  | 5.82  | 3.53   | 6.28   | 7.10   | 2.21   | 2.61   | 1.78    | 2.01     | Endocytosis       |
| NM_030263    | Psd3      | 10.91 | 14.83 | 14.77 | 9.74   | 20.75  | 17.92  | 1.36   | 1.35   | 2.13    | 1.84     | Endocytosis       |
| NM_173392    | Zfyve16   | 14.55 | 15.77 | 15.70 | 13.84  | 23.96  | 24.65  | 1.08   | 1.08   | 1.73    | 1.78     | Endocytosis       |
| NM_001085495 | Arfgef2   | 81.76 | 87.55 | 87.71 | 43.69  | 72.39  | 75.94  | 1.07   | 1.07   | 1.66    | 1.74     | Endocytosis       |
| NM_025519    | Chmp4c    | 142.7 | 141.0 | 169.0 | 106.80 | 171.1  | 182.4  | 0.99   | 1.18   | 1.60    | 1.71     | Endocytosis       |
| NM_175543    | Rab11fip4 | 2.83  | 2.38  | 3.41  | 3.65   | 6.81   | 6.83   | 0.84   | 1.21   | 1.87    | 1.87     | Endocytosis       |
| NM_001122832 | Eps15l1   | 43.08 | 43.79 | 42.06 | 27.14  | 42.39  | 45.29  | 1.02   | 0.98   | 1.56    | 1.67     | Endocytosis       |
| NM_001040111 | Arap1     | 30.20 | 26.74 | 28.65 | 16.39  | 25.83  | 27.38  | 0.89   | 0.95   | 1.58    | 1.67     | Endocytosis       |
| NM_001033375 | A230046   | 47.18 | 50.63 | 52.02 | 34.17  | 53.32  | 56.10  | 1.07   | 1.10   | 1.56    | 1.64     | Endocytosis       |
| NM_010515    | Igf2r     | 83.47 | 89.92 | 88.18 | 63.01  | 102.43 | 102.81 | 1.08   | 1.06   | 1.63    | 1.63     | Endocytosis       |
| NM_001122733 | Kit       | 7.64  | 7.51  | 10.68 | 4.01   | 16.48  | 14.59  | 0.98   | 1.40   | 4.11    | 3.64     | Endoc, Rap1       |
| NM_001167745 | Wasl      | 1.46  | 2.42  | 2.61  | 0.66   | 1.82   | 2.66   | 1.66   | 1.79   | 2.77    | 4.03     | Endoc, Actin      |
| NM_001286785 | Magi1     | 2.66  | 0.00  | 4.29  | 0.00   | 5.87   | 4.04   | 0.00   | 1.61   | 22016.1 | 15153.3  | Rap1              |
| NM_001167983 | Sipal11   | 17.00 | 20.16 | 17.18 | 9.07   | 31.30  | 40.89  | 1.19   | 1.01   | 3.45    | 4.51     | Rap1              |
| NM_001162425 | Efnal     | 1.11  | 1.13  | 2.20  | 0.00   | 1.18   | 2.25   | 1.02   | 1.99   | 11176.7 | 21339.5  | Rap1              |
| NM_178900    | Prkd2     | 2.16  | 2.68  | 5.14  | 0.53   | 3.69   | 3.55   | 1.24   | 2.37   | 6.97    | 6.70     | Rap1              |
| NM_001204165 | Rapgef4   | 0.00  | 0.00  | 0.00  | 0.00   | 2.59   | 1.64   | 91.70  | 403.31 | 2881.4  | 1824.2   | Rap1              |
| NM_001171004 | Prkd3     | 20.24 | 24.80 | 26.47 | 14.58  | 41.91  | 37.37  | 1.23   | 1.31   | 2.87    | 2.56     | Rap1              |
| NM_001145834 | Ralgds    | 10.22 | 0.00  | 15.63 | 8.96   | 27.76  | 22.40  | 0.00   | 1.53   | 3.10    | 2.50     | Rap1              |
| NM_175930    | Rapgef5   | 15.41 | 14.72 | 15.09 | 9.90   | 21.57  | 24.16  | 0.95   | 0.98   | 2.18    | 2.44     | Rap1              |
| NM_009624    | Adcy9     | 15.19 | 13.48 | 14.21 | 7.09   | 12.95  | 16.23  | 0.89   | 0.94   | 1.83    | 2.29     | Rap1              |
| NM_172803    | Dock4     | 4.70  | 6.21  | 6.53  | 3.06   | 7.27   | 7.57   | 1.32   | 1.39   | 2.38    | 2.48     | Rap1              |
| NM_001085450 | Ctnnd1    | 23.76 | 41.94 | 29.08 | 27.28  | 43.09  | 55.86  | 1.77   | 1.22   | 1.58    | 2.05     | Rap1              |
| NM_001163269 | Lpar5     | 70.77 | 80.03 | 82.57 | 33.98  | 55.19  | 64.75  | 1.13   | 1.17   | 1.62    | 1.91     | Rap1              |
| NM_001286784 | Magi1     | 22.79 | 21.12 | 24.94 | 14.32  | 27.85  | 25.98  | 0.93   | 1.09   | 1.95    | 1.81     | Rap1              |
| NM_001159354 | Magi3     | 62.99 | 69.44 | 62.65 | 39.27  | 67.84  | 69.86  | 1.10   | 0.99   | 1.73    | 1.78     | Rap1              |
| NM_175258    | Rapgef6   | 39.78 | 43.44 | 42.49 | 26.70  | 45.14  | 45.61  | 1.09   | 1.07   | 1.69    | 1.71     | Rap1              |
| NM_009623    | Adcy8     | 9.17  | 11.75 | 9.43  | 5.17   | 7.95   | 9.07   | 1.28   | 1.03   | 1.54    | 1.76     | Rap1              |
| NM_001145886 | Tiam1     | 27.91 | 30.38 | 33.07 | 10.63  | 36.10  | 45.54  | 1.09   | 1.19   | 3.39    | 4.28     | Rap1, Actin       |
| NM_001082960 | Itgam     | 5.05  | 5.61  | 4.97  | 0.00   | 2.76   | 1.33   | 1.11   | 0.98   | 1350.3  | 650.99   | Rap1, Actin       |
| NM_001130409 | Ptk2      | 12.68 | 11.15 | 10.93 | 4.89   | 13.38  | 17.31  | 0.88   | 0.86   | 2.74    | 3.54     | Actin             |

|              |          |       |       |       |       |       |        |      |      |      |      |       |
|--------------|----------|-------|-------|-------|-------|-------|--------|------|------|------|------|-------|
| NM_001081307 | Ppp1r12b | 8.37  | 8.95  | 8.29  | 2.09  | 7.17  | 7.45   | 1.07 | 0.99 | 3.44 | 3.57 | Actin |
| NM_008396    | Itga2    | 35.99 | 38.37 | 39.36 | 26.60 | 63.55 | 69.46  | 1.07 | 1.09 | 2.39 | 2.61 | Actin |
| NM_001005608 | Itgb4    | 0.69  | 6.09  | 3.09  | 1.84  | 4.62  | 4.79   | 8.86 | 4.49 | 2.52 | 2.61 | Actin |
| NM_001033228 | Itga1    | 16.08 | 17.78 | 17.15 | 16.27 | 30.11 | 31.77  | 1.11 | 1.07 | 1.85 | 1.95 | Actin |
| NM_172493    | Diaph2   | 11.13 | 11.55 | 10.16 | 9.96  | 19.11 | 19.42  | 1.04 | 0.91 | 1.92 | 1.95 | Actin |
| NM_027892    | Ppp1r12a | 75.89 | 82.69 | 78.50 | 54.66 | 96.74 | 102.46 | 1.09 | 1.03 | 1.77 | 1.87 | Actin |
| NM_027144    | Arhgef12 | 66.62 | 72.52 | 70.94 | 45.73 | 89.33 | 84.88  | 1.09 | 1.06 | 1.95 | 1.86 | Actin |
| NM_198127    | Abi2     | 0.60  | 1.08  | 0.98  | 0.19  | 1.41  | 1.16   | 1.80 | 1.63 | 7.28 | 5.99 | Actin |
| NM_153423    | Wasf2    | 130.8 | 145.1 | 135.4 | 85.11 | 150.2 | 152.1  | 1.11 | 1.03 | 1.76 | 1.79 | Actin |
| NM_001113517 | Arhgef7  | 1.88  | 3.07  | 1.42  | 1.34  | 3.43  | 3.16   | 1.63 | 0.76 | 2.55 | 2.35 | Actin |
| NM_177710    | Ssh2     | 29.89 | 33.83 | 33.78 | 19.91 | 32.84 | 33.83  | 1.13 | 1.13 | 1.65 | 1.70 | Actin |
| NM_015759    | Fgd3     | 0.97  | 0.78  | 1.47  | 1.35  | 2.34  | 2.85   | 0.80 | 1.52 | 1.74 | 2.12 | Actin |

<sup>1</sup>The FPKM (Fragments Per Kilobase Mega read) values. CTL, Control.

<sup>2</sup>Fold change is defined as the ratio of the signal of non-treated organoids to that of treated organoids.

**Table S2.** RNA-sequencing analysis of gene expression after 7 days of mecamylamine treatment.

| Genbank ID   | Gene Name | FPKM <sup>1</sup> |                    | Fold change <sup>2</sup> |                    | Pathway                        |
|--------------|-----------|-------------------|--------------------|--------------------------|--------------------|--------------------------------|
|              |           | CTL               | 10 <sup>-6</sup> M | 10 <sup>-6</sup> M       | 10 <sup>-6</sup> M |                                |
| NM_001164147 | Tcf3      |                   | 2.57               | 1.52                     | 0.59               | Stem                           |
| NM_011386    | Skil      |                   | 0.00               | 1.57                     | 15909.89           | Stem                           |
| NM_021878    | Jarid2    |                   | 1.14               | 1.10                     | 0.97               | Stem                           |
| NM_011548    | Tcf3      |                   | 5.30               | 6.24                     | 1.18               | Stem                           |
| NM_001039537 | Lif       |                   | 1.59               | 1.33                     | 0.84               | Stem                           |
| NM_001164042 | Smad5     |                   | 0.00               | 0.00                     | 0.53               | Stem                           |
| NM_001081149 | Kat6a     |                   | 8.90               | 9.03                     | 1.01               | Stem                           |
| NM_011263    | Rest      |                   | 3.66               | 3.46                     | 0.95               | Stem                           |
| NM_007958    | Smad4     |                   | 5.80               | 5.43                     | 0.94               | Stem                           |
| NM_001164153 | Tcf3      |                   | 0.37               | 0.00                     | 0.00               | Stem                           |
| NM_001205043 | Jarid2    |                   | 2.19               | 1.17                     | 0.54               | Stem                           |
| NM_175238    | Rif1      |                   | 9.67               | 9.57                     | 0.99               | Stem                           |
| NM_011535    | Tbx3      |                   | 1.89               | 0.07                     | 0.04               | Stem                           |
| NM_010560    | Il6st     |                   | 3.72               | 4.29                     | 1.15               | Stem                           |
| NM_007496    | Zfhx3     |                   | 1.28               | 1.11                     | 0.87               | Stem                           |
| NM_001163641 | Setdb1    |                   | 1.13               | 0.00                     | 0.00               | Stem                           |
| NM_172716    | Pcgf3     |                   | 11.91              | 10.89                    | 0.91               | Stem                           |
| NM_007395    | Acvr1b    |                   | 21.70              | 19.61                    | 0.90               | Stem                           |
| NM_001077495 | Pik3r1    |                   | 15.54              | 15.35                    | 0.99               | Stem, THS, Rap1, actin         |
| NM_019827    | Gsk3b     |                   | 10.01              | 9.98                     | 1.00               | Stem, THS, Hippo, Wnt          |
| NM_007614    | Cttnb1    |                   | 81.21              | 68.20                    | 0.84               | Stem, THSHippo, Wnt, Rap1      |
| NM_007561    | Bmpr2     |                   | 3.89               | 3.82                     | 0.98               | Stem, Hippo                    |
| NM_008055    | Fzd4      |                   | 3.82               | 3.16                     | 0.83               | Stem, Hippo, Wnt               |
| NM_001162494 | Fzd6      |                   | 1.62               | 1.65                     | 1.02               | Stem, Hippo, Wnt               |
| NM_022721    | Fzd5      |                   | 7.96               | 7.76                     | 0.97               | Stem, Hippo, Wnt               |
| NM_007889    | Dvl3      |                   | 8.24               | 9.05                     | 1.10               | Stem, Hippo, Wnt               |
| NM_001256224 | Wnt5a     |                   | 0.02               | 0.00                     | 0.00               | Stem, Hippo, Wnt               |
| NM_011719    | Wnt9b     |                   | 0.05               | 0.18                     | 0.29               | Stem, Hippo, Wnt               |
| NM_007462    | Apc       |                   | 8.54               | 8.23                     | 0.96               | Stem, Hippo, Wnt               |
| NM_010207    | Fgfr2     |                   | 1.92               | 2.39                     | 1.25               | Stem, MAPK, Endoc, Rap1, Actin |
| NM_001080118 | Med1      |                   | 9.18               | 8.78                     | 0.96               | THS                            |
| NM_012005    | Med14     |                   | 2.57               | 4.12                     | 1.60               | THS                            |
| NM_001205314 | Stat1     |                   | 1.48               | 1.24                     | 0.84               | THS                            |
| NM_001110350 | Sin3a     |                   | 3.96               | 1.69                     | 0.43               | THS                            |
| NM_020005    | Kat2b     |                   | 1.10               | 0.41                     | 0.37               | THS                            |
| NM_008678    | Ncoa2     |                   | 4.81               | 6.23                     | 1.30               | THS                            |
| NM_001252313 | Ncor1     |                   | 18.51              | 18.04                    | 0.97               | THS                            |
| NM_001080931 | Med13     |                   | 6.31               | 6.22                     | 0.98               | THS                            |
| NM_011062    | Pdpk1     |                   | 9.16               | 7.76                     | 0.85               | THS                            |
| NM_001286718 | Tsc2      |                   | 0.92               | 1.05                     | 1.15               | THS                            |
| NM_007503    | Fxyd2     |                   | 0.00               | 0.00                     | 1.00               | THS                            |
| NM_008714    | Notch1    |                   | 4.93               | 4.90                     | 0.99               | THS                            |
| NM_001286713 | Tsc2      |                   | 0.00               | 1.76                     | 1577.57            | THS                            |
| NM_172424    | Med13l    |                   | 4.90               | 5.19                     | 1.06               | THS                            |
| NM_021521    | Med12     |                   | 6.45               | 6.73                     | 1.04               | THS                            |
| NM_011308    | Ncor1     |                   | 6.61               | 8.16                     | 1.24               | THS                            |
| NM_008716    | Notch3    |                   | 0.51               | 0.36                     | 0.71               | THS                            |
| NM_177229    | Ncor1     |                   | 3.83               | 2.86                     | 0.75               | THS                            |

|              |               |       |       |           |                          |
|--------------|---------------|-------|-------|-----------|--------------------------|
| NM_011378    | Sin3a         | 1.61  | 1.10  | 0.68      | THS                      |
| NM_001025432 | Crebbp        | 3.83  | 3.80  | 0.99      | THS, Wnt                 |
| NM_177821    | Ep300         | 8.84  | 8.71  | 0.99      | THS, Wnt                 |
| NM_001145830 | Plcb1         | 0.32  | 0.02  | 0.07      | THS, Wnt, Rap1           |
| NM_001005784 | Patj          | 0.76  | 0.81  | 1.06      | Hippo                    |
| NM_026735    | Mob1b         | 11.70 | 9.75  | 0.83      | Hippo                    |
| NM_007862    | Dlg1          | 5.16  | 8.55  | 1.66      | Hippo                    |
| NM_001252253 | Nf2           | 0.00  | 0.40  | 397838.81 | Hippo                    |
| NM_001109752 | Dlg4          | 0.00  | 0.00  | 0.80      | Hippo                    |
| NM_145571    | Mob1a         | 38.46 | 37.04 | 0.96      | Hippo                    |
| NM_001166585 | Tead1         | 4.36  | 4.91  | 1.13      | Hippo                    |
| NM_010690    | Lats1         | 11.01 | 10.81 | 0.98      | Hippo                    |
| NM_134015    | Fbxw11        | 0.71  | 0.00  | 0.00      | Hippo, Wnt               |
| NM_001271347 | Fbxw11        | 0.63  | 0.00  | 0.00      | Hippo, Wnt               |
| NM_001271348 | Fbxw11        | 8.64  | 7.20  | 0.83      | Hippo, Wnt               |
| NM_001142920 | Tcf7l2        | 2.07  | 2.34  | 1.13      | Hippo, Wnt               |
| NM_009371    | Tgfbr2        | 4.01  | 7.30  | 1.82      | Hippo, MAPK, Endoc       |
| NM_001122850 | Pard3         | 5.91  | 4.94  | 0.84      | Hippo, Endocytosis, Rap1 |
| NM_020601    | Tb11x         | 30.33 | 27.33 | 0.90      | Wnt                      |
| NM_001004367 | Cxxc4         | 0.05  | 0.15  | 3.04      | Wnt                      |
| NM_008514    | Lrp6          | 9.12  | 9.16  | 1.00      | Wnt                      |
| NM_013502    | Ctbp1         | 3.20  | 2.36  | 0.74      | Wnt                      |
| NM_172688    | Map3k7        | 0.58  | 0.53  | 0.91      | Wnt, MAPK                |
| NM_001164112 | Nfatc1        | 0.48  | 0.00  | 0.00      | Wnt, MAPK                |
| NM_013931    | Mapk8ip3      | 1.54  | 0.42  | 0.27      | MAPK                     |
| NM_001163453 | Mapk8ip3      | 4.57  | 2.47  | 0.54      | MAPK                     |
| NM_008696    | Map4k4        | 1.11  | 0.00  | 0.00      | MAPK                     |
| NM_001285488 | Mknk1         | 0.00  | 0.00  | 6.28      | MAPK                     |
| NM_001163643 | Map3k12       | 0.50  | 0.00  | 0.00      | MAPK                     |
| NM_009784    | Cacna2d1      | 0.21  | 0.39  | 1.84      | MAPK                     |
| NM_007923    | Elk4          | 6.27  | 6.61  | 1.05      | MAPK                     |
| NM_001038609 | Mapt          | 0.00  | 0.00  | 1.16      | MAPK                     |
| NM_148945    | Rps6ka3       | 15.01 | 15.05 | 1.00      | MAPK                     |
| NM_172821    | Map3k13       | 2.66  | 2.98  | 1.12      | MAPK                     |
| NM_001161423 | Ikbkg         | 0.43  | 0.00  | 0.00      | MAPK                     |
| NM_001252060 | Cacna1a       | 1.09  | 0.99  | 0.91      | MAPK                     |
| NM_001284371 | Atf2          | 0.66  | 0.34  | 0.52      | MAPK                     |
| NM_144825    | Taok1         | 6.16  | 6.33  | 1.03      | MAPK                     |
| NM_001252202 | Map4k4        | 3.28  | 2.72  | 0.83      | MAPK                     |
| NM_007746    | Map3k8        | 0.75  | 1.02  | 1.37      | MAPK                     |
| NM_013560    | Hspb1         | 0.12  | 0.00  | 0.00      | MAPK                     |
| NM_134080    | Flnb          | 30.98 | 27.32 | 0.88      | MAPK                     |
| NM_010897    | Nfi           | 3.89  | 3.75  | 0.97      | MAPK                     |
| NM_011946    | Map3k2        | 4.29  | 4.15  | 0.97      | MAPK                     |
| NM_001174049 | Cacna2d2      | 0.36  | 0.17  | 0.48      | MAPK                     |
| NM_001025093 | Atf2          | 3.29  | 2.69  | 0.82      | MAPK                     |
| NM_008301    | Hspa2         | 0.65  | 0.37  | 0.57      | MAPK, Endoc              |
| NM_007764    | Crkl          | 8.08  | 7.49  | 0.93      | MAPK, Rap1, Actin        |
| NM_139294    | Braf          | 3.60  | 3.45  | 0.96      | MAPK, Rap1, Actin        |
| NM_001177558 | Gng12         | 0.96  | 0.00  | 0.00      | MAPK, Actin              |
| NM_001162868 | Rab11fip3     | 1.32  | 0.00  | 0.00      | Endocytosis              |
| NM_007619    | Cbl           | 7.00  | 7.29  | 1.04      | Endocytosis              |
| NM_001134383 | Iqsec1        | 1.18  | 0.27  | 0.23      | Endocytosis              |
| NM_001276462 | Asap1         | 0.71  | 0.00  | 0.00      | Endocytosis              |
| NM_001164056 | Pld1          | 3.60  | 0.00  | 0.00      | Endocytosis              |
| NM_029438    | Smurf1        | 0.94  | 1.43  | 1.51      | Endocytosis              |
| NM_001080813 | Rab11fip1     | 6.24  | 5.41  | 0.87      | Endocytosis              |
| NM_001164678 | Pdcd6ip       | 1.29  | 1.95  | 1.51      | Endocytosis              |
| NM_010153    | Erbp3         | 25.80 | 25.04 | 0.97      | Endocytosis              |
| NM_001114664 | Iqsec2        | 0.79  | 0.93  | 1.18      | Endocytosis              |
| NM_001144988 | Spg20         | 0.00  | 1.07  | 14798.36  | Endocytosis              |
| NM_001285806 | Grk3          | 0.00  | 0.00  | 2.25      | Endocytosis              |
| NM_001164367 | Rab11fip2     | 0.39  | 0.61  | 1.59      | Endocytosis              |
| NM_027487    | Ccdc53        | 0.00  | 1.33  | 102631.60 | Endocytosis              |
| NM_030263    | Psd3          | 2.60  | 2.45  | 0.94      | Endocytosis              |
| NM_173392    | Zfyve16       | 3.00  | 2.85  | 0.95      | Endocytosis              |
| NM_001085495 | Arfgef2       | 10.30 | 9.15  | 0.89      | Endocytosis              |
| NM_025519    | Chmp4c        | 22.60 | 23.80 | 1.05      | Endocytosis              |
| NM_175543    | Rab11fip4     | 0.70  | 0.31  | 0.43      | Endocytosis              |
| NM_001122832 | Eps15l1       | 6.59  | 5.20  | 0.79      | Endocytosis              |
| NM_001040111 | Arap1         | 3.98  | 2.39  | 0.60      | Endocytosis              |
| NM_001033375 | A230046K03Rik | 10.67 | 10.12 | 0.95      | Endocytosis              |
| NM_010515    | Igf2r         | 10.45 | 9.27  | 0.89      | Endocytosis              |
| NM_001122733 | Kit           | 2.58  | 1.13  | 0.44      | Endoc, Rap1              |
| NM_001167745 | Wasl          | 0.51  | 0.33  | 0.65      | Endoc, Actin             |
| NM_001286785 | Magi1         | 0.00  | 0.00  | 0.12      | Rap1                     |
| NM_001167983 | Sipa1l1       | 4.58  | 3.27  | 0.71      | Rap1                     |
| NM_001162425 | Efnal         | 0.00  | 0.00  | 1.32      | Rap1                     |
| NM_178900    | Prkd2         | 1.19  | 0.69  | 0.58      | Rap1                     |
| NM_001204165 | Rapgef4       | 0.00  | 0.00  | 0.02      | Rap1                     |

|              |          |       |       |      |             |
|--------------|----------|-------|-------|------|-------------|
| NM 001171004 | Prkd3    | 4.85  | 5.81  | 1.20 | Rap1        |
| NM 001145834 | Ralgds   | 3.25  | 3.41  | 1.05 | Rap1        |
| NM 175930    | Rapgef5  | 3.54  | 3.39  | 0.96 | Rap1        |
| NM 009624    | Adcy9    | 1.87  | 1.22  | 0.65 | Rap1        |
| NM 172803    | Dock4    | 0.73  | 1.00  | 1.38 | Rap1        |
| NM 001085450 | Ctnnd1   | 4.76  | 3.79  | 0.80 | Rap1        |
| NM 001163269 | Lpar5    | 5.87  | 2.14  | 0.36 | Rap1        |
| NM 001286784 | Magi1    | 3.84  | 1.87  | 0.49 | Rap1        |
| NM 001159354 | Magi3    | 6.04  | 5.26  | 0.87 | Rap1        |
| NM 175258    | Rapgef6  | 4.91  | 5.11  | 1.04 | Rap1        |
| NM 009623    | Adcy8    | 0.23  | 0.33  | 1.40 | Rap1        |
| NM 001145886 | Tiam1    | 5.91  | 1.88  | 0.32 | Rap1, Actin |
| NM 001082960 | Itgam    | 1.41  | 0.59  | 0.42 | Rap1, Actin |
| NM 001130409 | Ptk2     | 1.83  | 3.65  | 1.99 | Actin       |
| NM 001081307 | Ppp1r12b | 0.82  | 1.07  | 1.30 | Actin       |
| NM 008396    | Itga2    | 8.54  | 7.42  | 0.87 | Actin       |
| NM 001005608 | Itgb4    | 0.14  | 0.55  | 3.96 | Actin       |
| NM 001033228 | Itga1    | 2.26  | 3.02  | 1.34 | Actin       |
| NM 172493    | Diaph2   | 2.22  | 2.62  | 1.18 | Actin       |
| NM 027892    | Ppp1r12a | 18.43 | 19.40 | 1.05 | Actin       |
| NM 027144    | Arhgef12 | 11.42 | 11.48 | 1.00 | Actin       |
| NM 198127    | Abi2     | 0.42  | 0.32  | 0.77 | Actin       |
| NM 153423    | Wasf2    | 20.78 | 19.01 | 0.92 | Actin       |
| NM 001113517 | Arhgef7  | 0.21  | 0.22  | 1.05 | Actin       |
| NM 177710    | Ssh2     | 3.59  | 3.91  | 1.09 | Actin       |
| NM 015759    | Fgd3     | 0.50  | 0.27  | 0.54 | Actin       |

<sup>†</sup>1The FPKM (Fragments Per Kilobase Mega read) values. CTL, Control.

<sup>\*</sup>2Fold change is defined as the ratio of the signal of non-treated organoids to that of treated organoids.

**Table S3.** Primers for RT-PCR.

| Gene         | Forward primer        | Reverse primer        |
|--------------|-----------------------|-----------------------|
| $\alpha 1$   | TCCCTTCGATGAGCAGAACT  | ATGATGGACGCAATGACAAA  |
| $\alpha 2$   | TCCCTCACTGCTTTCCTGCT  | ACACCCATGGAAGAGTCTGG  |
| $\alpha 3$   | CCTTCCACCTCACTGGTCAT  | CAGAGCAGACAGGGACAACA  |
| $\alpha 4$   | CCGGAGACTTATCGAATCCA  | TGGTCTGACACTGGAAGCTG  |
| $\alpha 5$   | AAAAGTGGGTTTCGTCCTGTG | ATGAGCCGAATTCATGGAG   |
| $\alpha 6$   | AACCTGCACTCCGGTTTATG  | TCCAGGTATCACACCGTCA   |
| $\alpha 7$   | CCCGGAGTGAAAATGTTTCGT | TGAGACAAGGAATGAGC     |
| $\alpha 9$   | GATCGATGGGCTCATCACCT  | AACGATATGAGGACGCAAGG  |
| $\alpha 10$  | CGTTCCACTCATCGGAAAGT  | GGCAATGGAAGCTACGTGAT  |
| $\beta 1$    | GGAGAGGAGAGGCAGGAAGT  | GGAGAAGGCGACAAGGACCA  |
| $\beta 2$    | TTTGACCAGCAGAACTGCAC  | GTACTTTCCCACCAGCGGTA  |
| $\beta 3$    | CGATGGAATCCCAGAACTA   | CAGGCAGGGGATTATCAAAA  |
| $\beta 4$    | TTCCATCGTCACCACTGTGT  | TCACTCTCCAAATGCTGTGC  |
| <i>Lgr5</i>  | GTCTCCTACATCGCCTCTGC  | TTCCAAAGGCGTAGTCTGCT  |
| <i>Sox9</i>  | AGGAAGCTGGCAGACCAGTA  | CCCTCTCGTTTACAGATCAAC |
| <i>Ngn3</i>  | CCCAGAGACACAACAACCT   | TCTGAGTCAGTGCCAGATG   |
| <i>Hnf1</i>  | GAGAGGTGGCTCAGCAATTC  | GCCGCAGACACTGTGACTAA  |
| <i>Klf4</i>  | CAGCTTCAGCTATCCGATCC  | CGCCTCTTGCTTAATCTTGG  |
| <i>GAPDH</i> | AACTTTGGCATTGTGGAAGG  | ACACATTGGGGGTAGGAACA  |

**Table S4.** Primers for quantitative RT-PCR.

| <b>Gene</b>  | <b>Forward primer</b> | <b>Reverse primer</b>    |
|--------------|-----------------------|--------------------------|
| <i>Lgr5</i>  | AGCATACCCGTTTCTGGATG  | AGGACCGTTTCTCAACATCG     |
| <i>Sox9</i>  | ATAAGTTCCCCGTGTGCATC  | TGACGTGTGGCTTGTTCTTG     |
| <i>Ngn3</i>  | AAGCAGAAGTGGGTGACTGC  | TCTTCGCTGTTTGCTGAGTG     |
| <i>Hnf1</i>  | AAAACCCCAGCAAGGAAGAG  | GGTTGGCAAACCAGTTGTAG     |
| <i>Klf4</i>  | AGCATACCCGTTTCTGGATG  | CTGTGTGTTTGCGGTAGTGCC    |
| <i>Wnt5a</i> | CAAATAGGCAGCCGAGAGAC  | CTCTAGCGTCCACGAACTCC     |
| $\alpha 2$   | ATCGTGCGCTTTGGACTATC  | TTAGCCAGACATTGGTGGTC     |
| $\beta 4$    | TGCTGGCACTCACATTCTTC  | AGTGGTGACGATGGAAAAGG     |
| <i>GAPDH</i> | TGACGTGCCGCCTGGAGAAA  | AGTGTAGCCCAAGATGCCCTTCAG |
